# Supplementary material for: Kinetics and electrochemical evolution of binary silicon–polymer systems for lithium ion batteries
Source: Royal Society of Chemistry journal article supplement (doi:10.1039/c7ra06023h), 2017-01-01
Supplement: c7ra06023h1.pdf [file c7ra06023h1.pdf]

## Supporting Information

# Kinetics and Electrochemical Evolution of Binary Silicon-Polymer Systems for Lithium Ion Batteries

Changling Li,<sup>a</sup> Chueh Liu,<sup>b</sup> Kazi Ahmed,<sup>b</sup> Zafer Mutlu,<sup>a</sup> Yiran Yan,<sup>a</sup> Ilkeun Lee,<sup>c</sup> Mihrimah Ozkan<sup>b</sup> and Cengiz S. Ozkan<sup>\*a</sup>

<sup>a</sup>Materials Science and Engineering Program, Department of Mechanical Engineering, University of California Riverside, CA 92521 (USA). Contact email: cozkan@engr.ucr.edu

<sup>b</sup>Department of Electrical and Computer Engineering, Department of Chemistry, University of California, Riverside, CA 92521 (USA).

<sup>c</sup>Central Facility of Advanced Microscopy and Microanalysis, Analytical Chemistry Instrumentation Facility, University of California, Riverside, CA 92521.

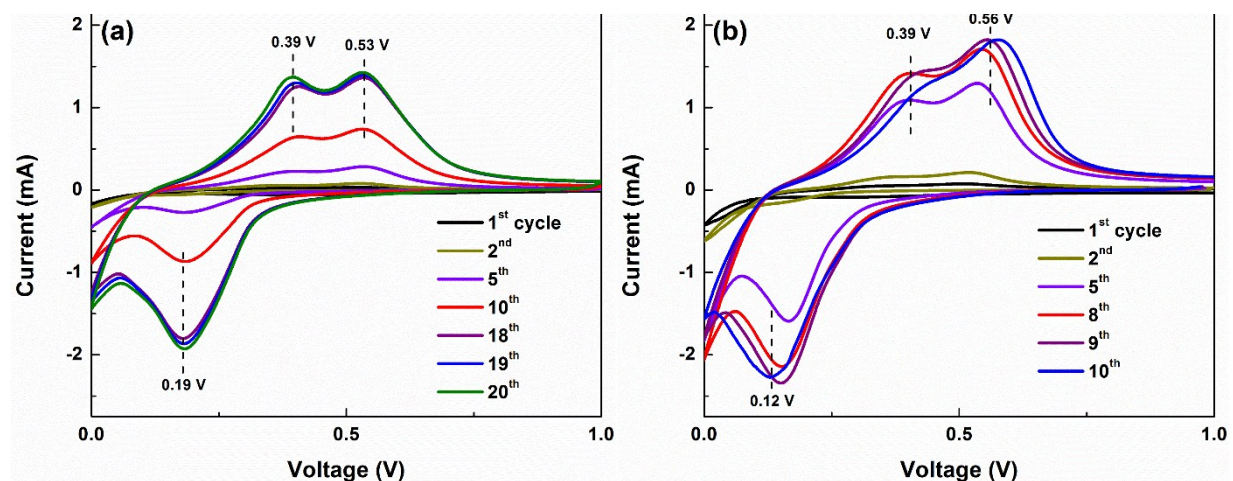

**Fig. S1** (a-b) Cyclic voltammetry characteristics of Si-PANI and Si-PAA electrodes, respectively.

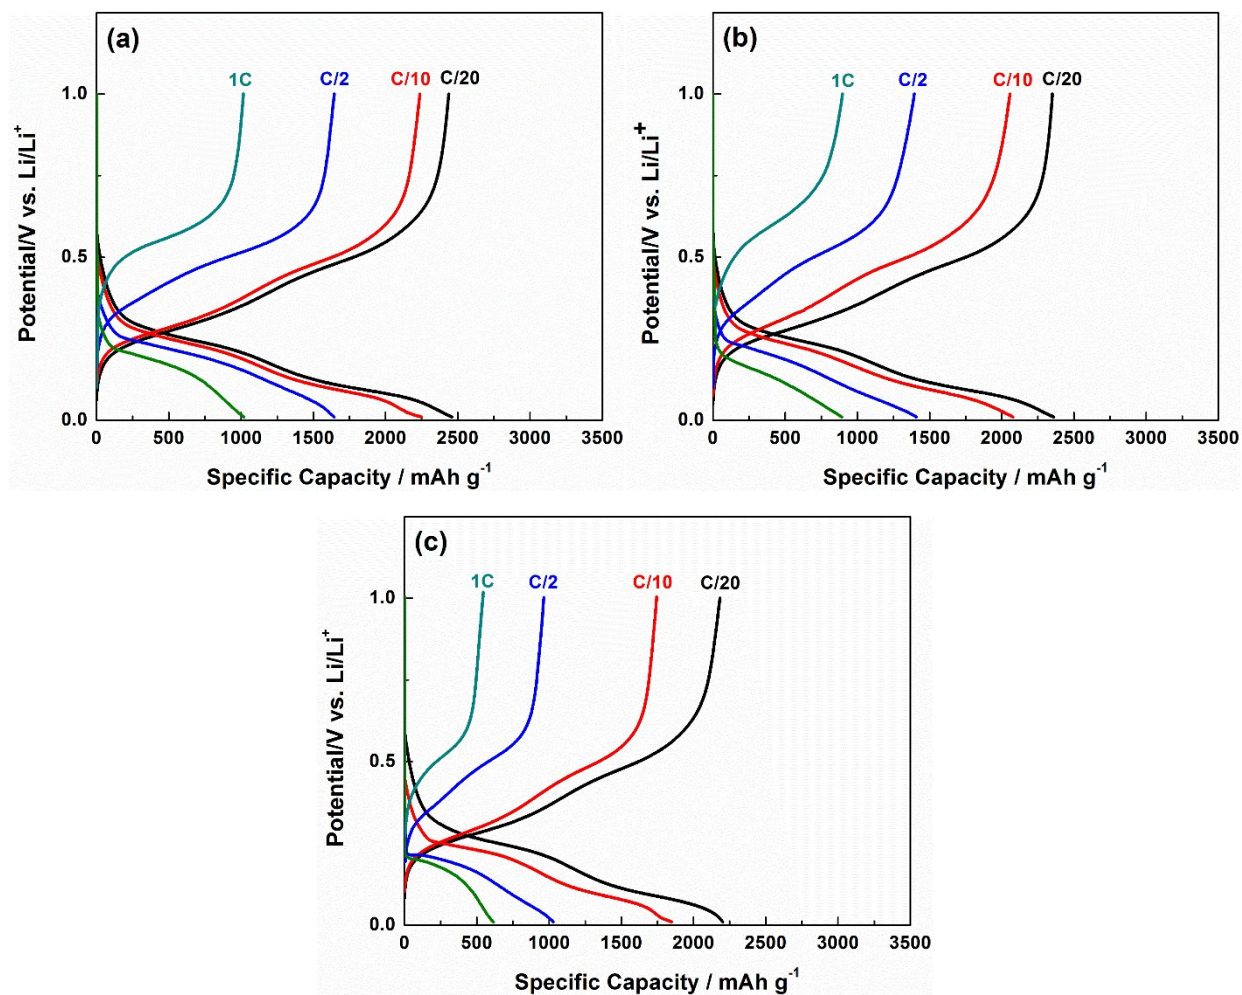

**Fig. S2** (a-c) Galvanostatic charge-discharge profiles of Si-PPy, Si-PANI and Si-PAA at selected C-rates, respectively.

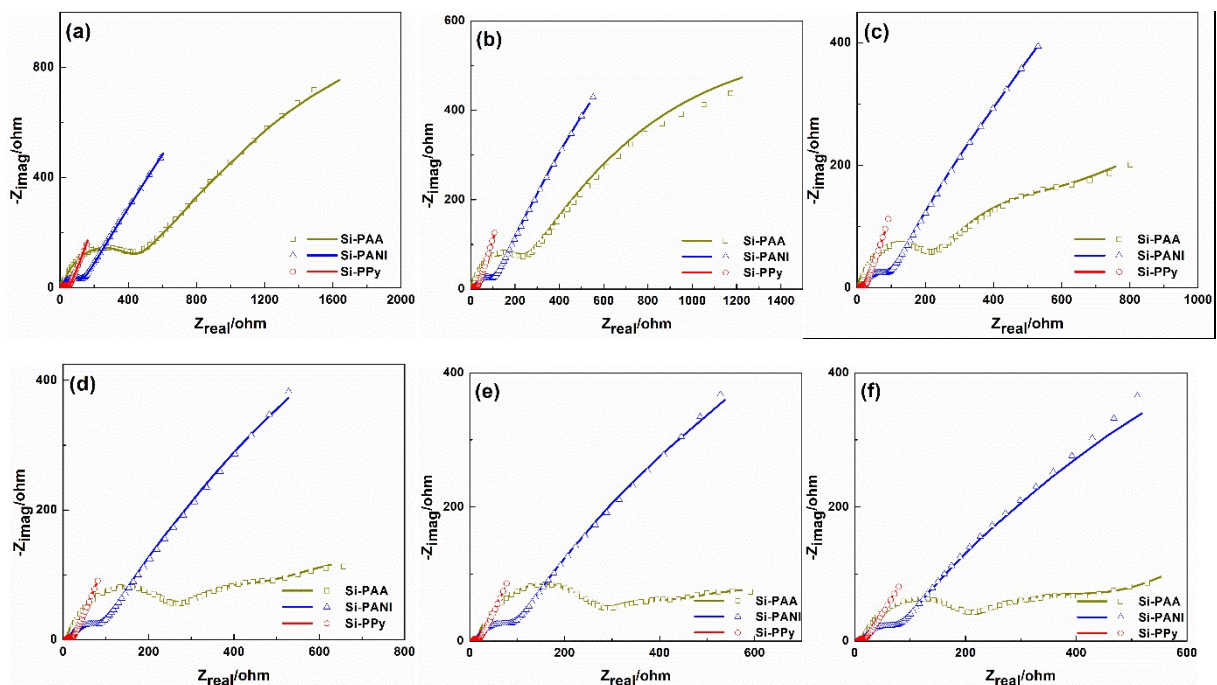

**Fig. S3** (a-f) Nyquist plots of Si-PPy, Si-PANI and Si-PAA anodes from 2<sup>nd</sup> to 7<sup>th</sup> cycle.

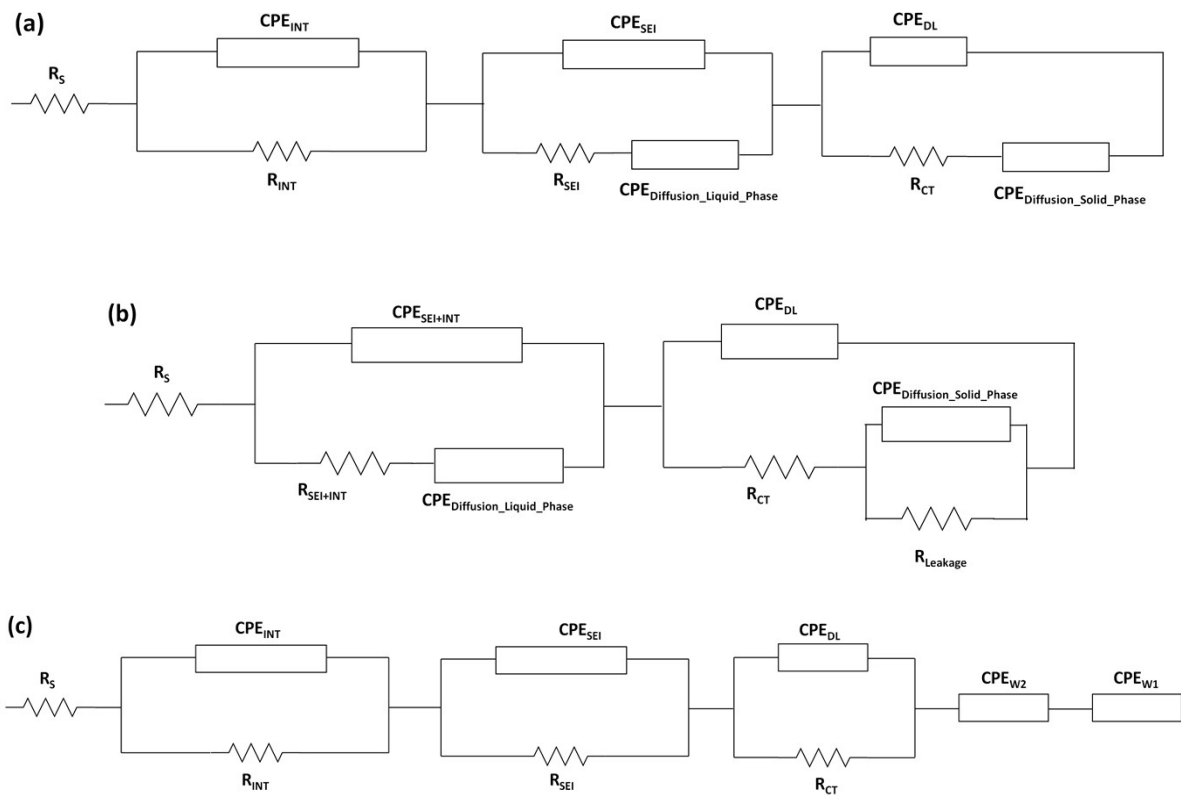

**Fig. S4** (a-c) Equivalent circuit of Si-PPy, Si-PANI and Si-PAA anodes used to produce fitted model data, respectively.
